# Supplementary material for: Assessing methods to quantitatively validate TGFβ-dependent autophagy
Source: PubMed Central journal article supplement (PMC7710024; doi:10.1242/bio.055103), 2020-11-26
Supplement: biolopen-9-055103-s1.pdf [file biolopen-9-055103-s1.pdf]

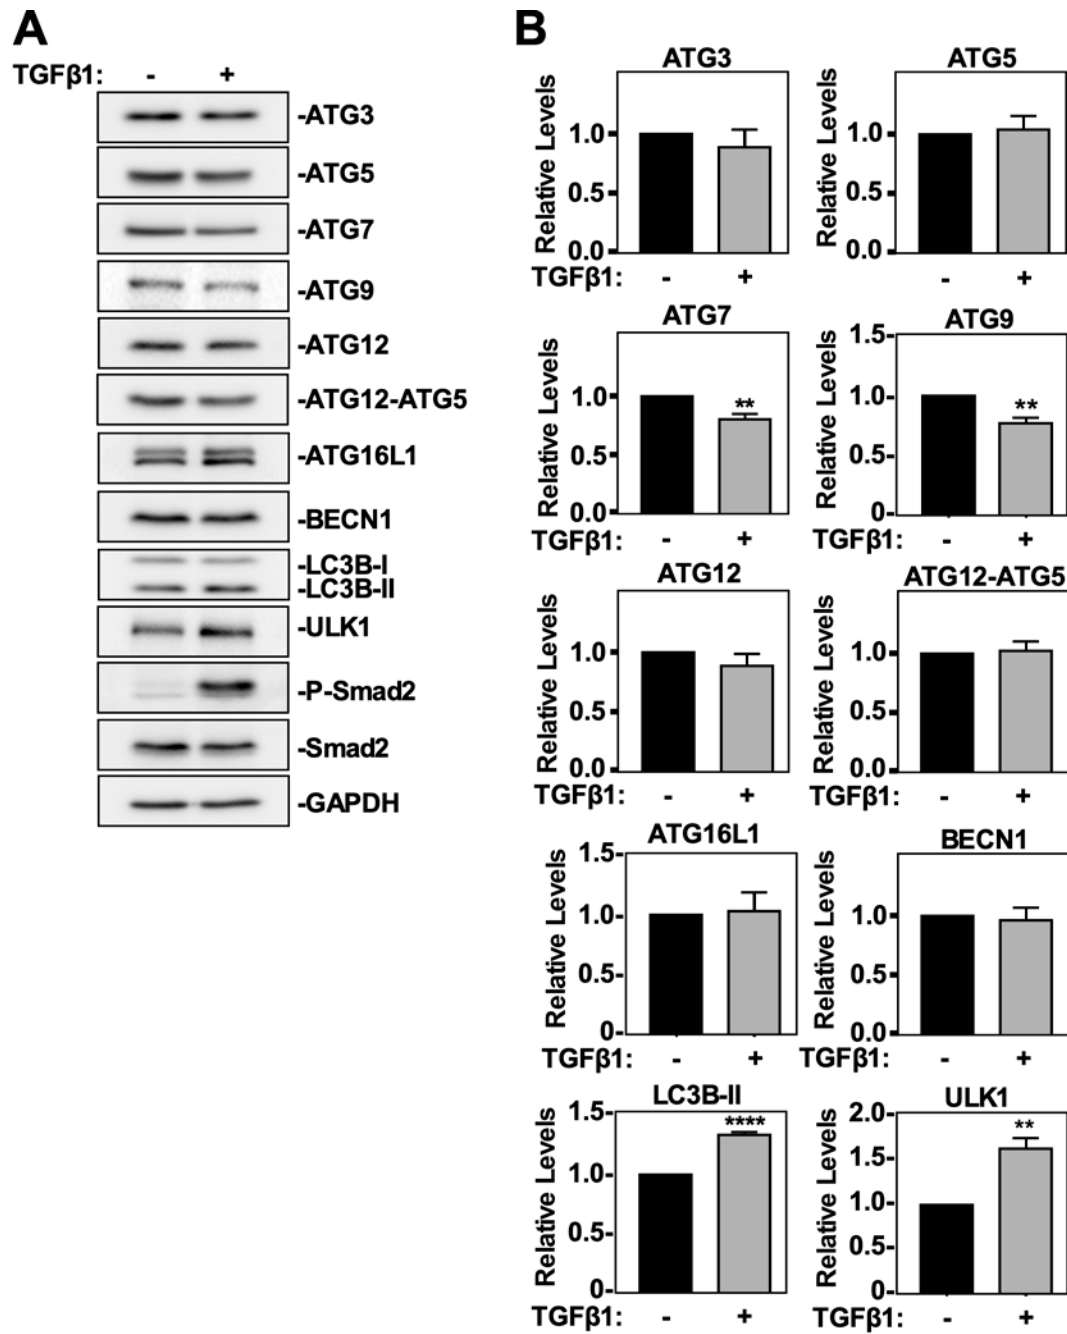

Supplemental Figure 1. Trelford and Di Guglielmo

**Figure S1. The effect of TGF $\beta$ 1 on ATG protein levels and LC3B lipidation in H1299 cells.**

**A)** H1299 cells were treated with 250 pM TGF $\beta$ 1 for 24 hours. Cells were lysed and subjected to SDS-PAGE and immunoblotting using anti-ATG3, anti-ATG5, anti-ATG7, anti-ATG9, anti-ATG12, anti-ATG12-ATG5 complex, anti-ATG16L1, anti-BECN1, anti-ULK1, anti-LC3B, anti-P-Smad2, anti-Smad2 and anti-GAPDH (loading control) antibodies.

**B)** Phosphoimaging analysis of steady state levels of ATG7, ATG5, ATG3, ATG12-ATG5, GAPDH, BECN1, ATG12 and LC3B were quantitated and graphed (n=3 $\pm$  SEM). Significance is indicated as \*=P<0.05, \*\*P<0.01 and \*\*\*\*=P<0.0001.

### A Chloroquine

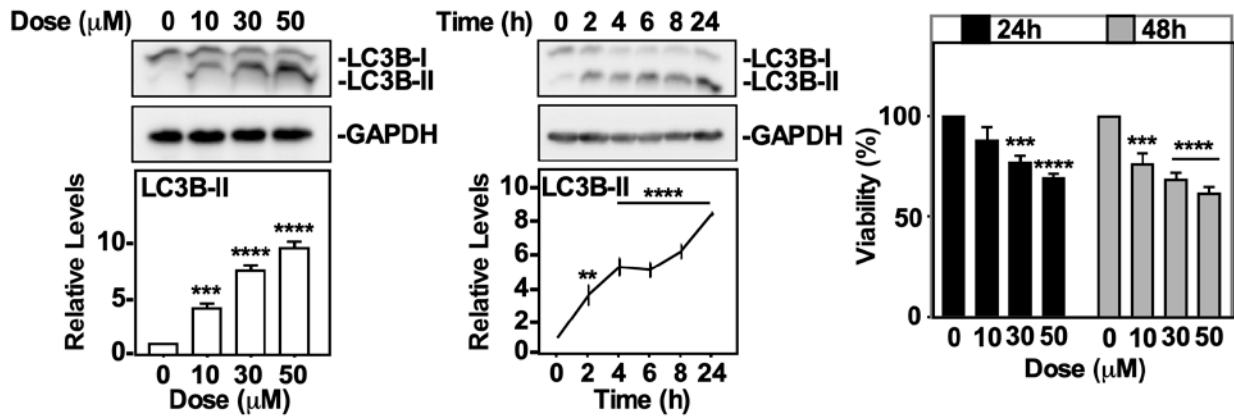

### B Spautin-1

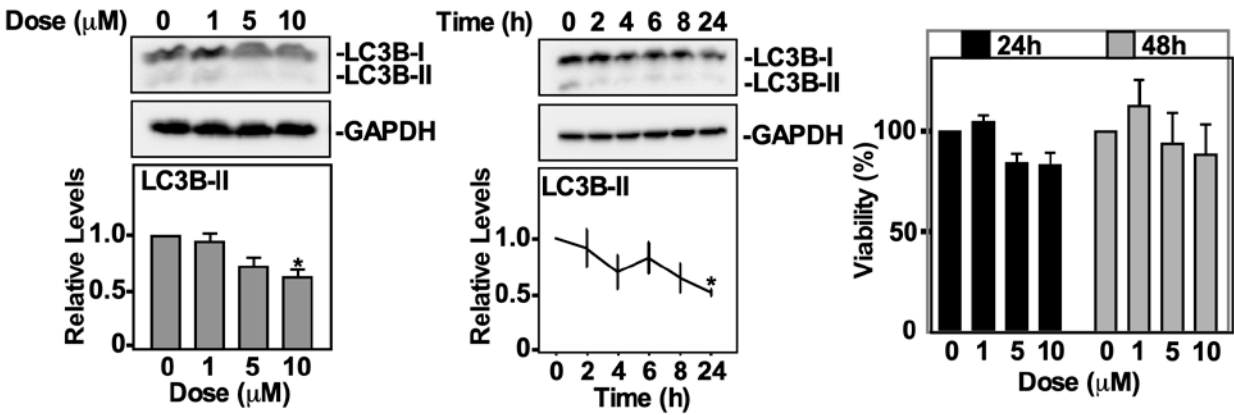

### C MG132

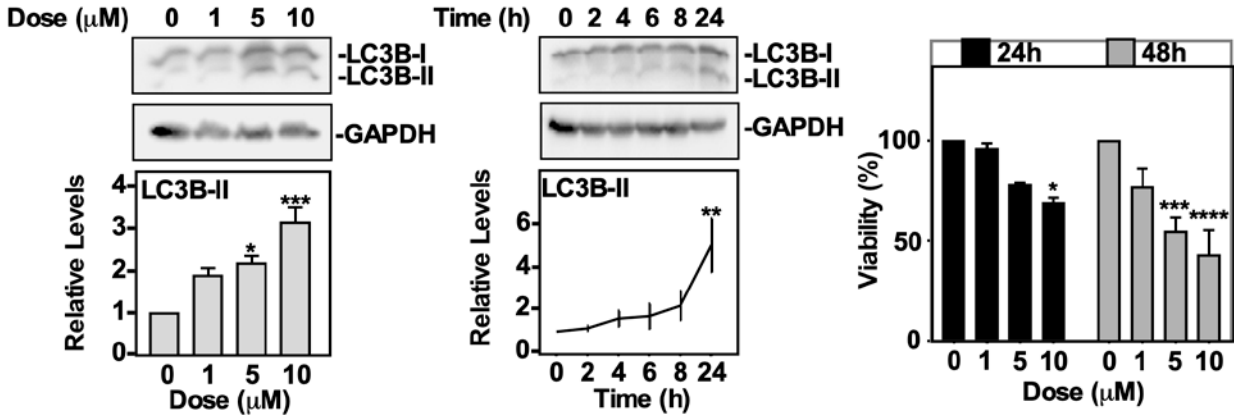

Supplemental Figure 2. Treford and Di Guglielmo

**Figure S2. The effects of chloroquine, spautin-1 and MG132 on LC3 lipidation and viability of A549 cells.**

**A)** A549 cells were treated with 0-50  $\mu\text{M}$  chloroquine for 24 hours (left panel) or A549 cells were treated with 50  $\mu\text{M}$  chloroquine for 0, 2, 4, 6, 8 or 24 hours (middle panel). Cells were lysed and subjected to SDS-PAGE and immunoblotting using anti-GAPDH and anti-LC3B antibodies. Quantitative analysis of steady state LC3B levels are shown graphically below representative immunoblots. A549 cells were treated with 0-50  $\mu\text{M}$  chloroquine for 24 or 48 hours and subjected to an MTT assay (right panel). The data were graphed from 4 independent experiments (mean  $\pm$  SEM). Significance is indicated as  $**P<0.01$ ,  $***=P<0.001$  and  $****=P<0.0001$ .

**B)** A549 cells were treated with 0-10  $\mu\text{M}$  spautin-1 for 24 hours (left panel) or A549 cells were treated with 10  $\mu\text{M}$  spautin-1 for 0, 2, 4, 6, 8 or 24 hours (middle panel). Cells were lysed and subjected to SDS-PAGE and immunoblotting using anti-GAPDH and anti-LC3B antibodies. Quantitative analysis of steady state LC3B levels are shown graphically below representative immunoblots. A549 cells were treated with 0-10  $\mu\text{M}$  spautin-1 for 24 or 48 hours and subjected to an MTT assay (right panel). The data were graphed from 4 independent experiments (mean  $\pm$  SEM). Significance is indicated as  $*=P<0.05$ .

**C)** A549 cells were treated with 0-10  $\mu\text{M}$  MG132 for 24 hours (left panel) or A549 cells were treated with 10  $\mu\text{M}$  MG132 for 0, 2, 4, 6, 8 or 24 hours (middle panel). Cells were lysed and subjected to SDS-PAGE and immunoblotting using anti-GAPDH and anti-LC3B antibodies. Quantitative analysis of steady state LC3B levels are shown graphically below representative immunoblots. A549 cells were treated with 0-10  $\mu\text{M}$  MG132 for 24 or 48 hours and subjected to an MTT assay (right panel). The data were graphed from 4 independent experiments (mean  $\pm$  SEM). Significance is indicated as  $*=P<0.05$ ,  $**P<0.01$ ,  $***=P<0.001$  and  $****=P<0.0001$ .

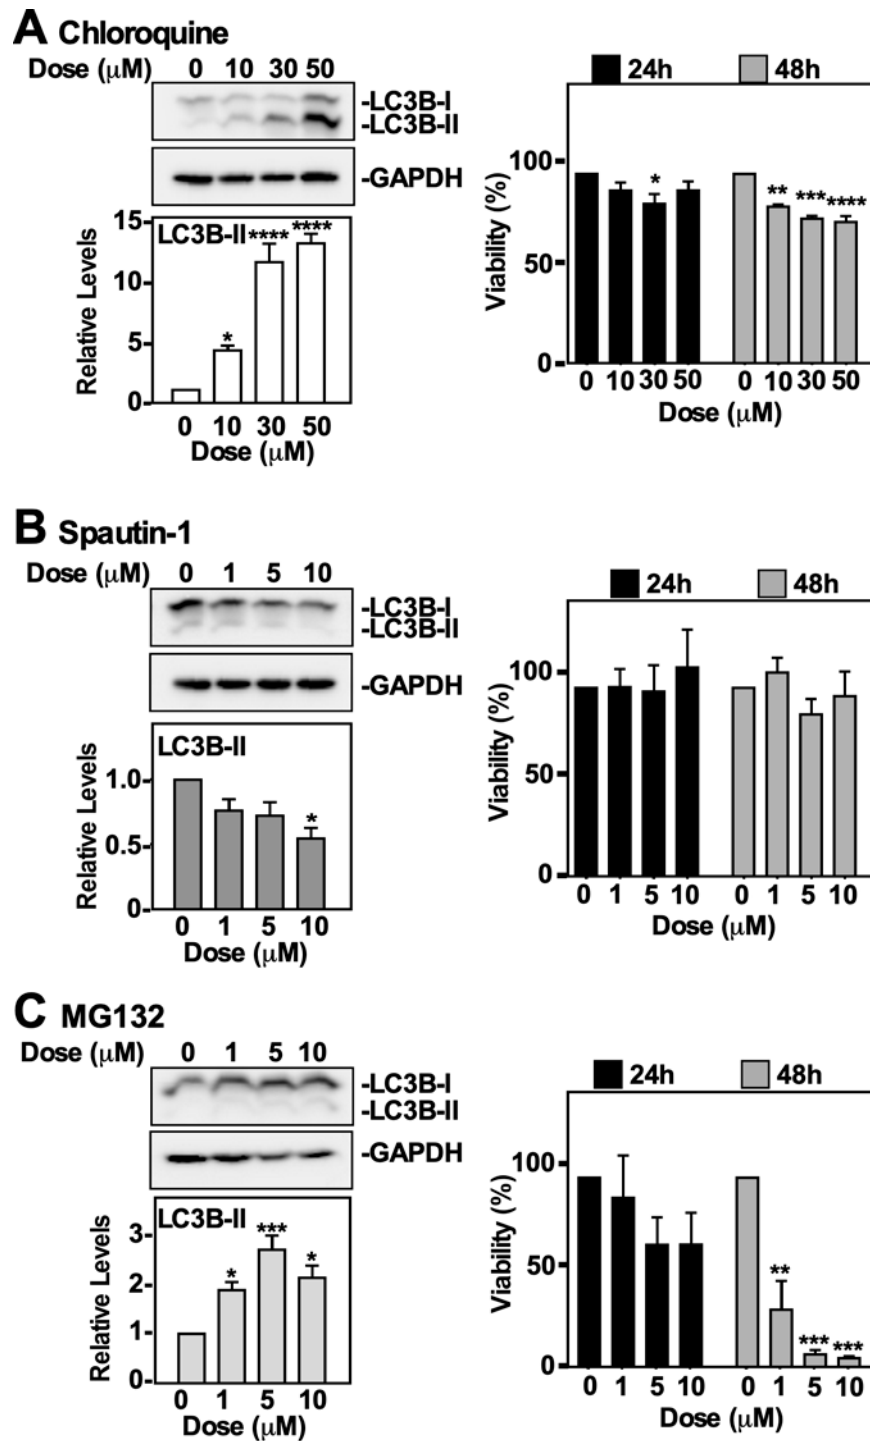

Supplemental Figure 3. Trelford and Di Guglielmo

**Figure S3. The effects of chloroquine, spautin-1 and MG132 on LC3 lipidation and viability of H1299 cells.**

A) H1299 cells were treated with 0-50  $\mu\text{M}$  chloroquine for 24 hours (left panel). Cells were lysed and subjected to SDS-PAGE and immunoblotting using anti-GAPDH and anti-LC3B antibodies.

Phosphoimaging analysis of steady state LC3B levels are shown graphically below representative immunoblots. H1299 cells were treated with 0-50  $\mu$ M chloroquine for 24 or 48 hours and subjected to an MTT assay (right panel). The data were graphed from 4 independent experiments (mean  $\pm$  SEM). Significance is indicated as  $*=P<0.05$ ,  $**P<0.01$ ,  $***=P<0.001$  and  $****=P<0.0001$ .

**B)** H1299 cells were treated with 0-10  $\mu$ M spautin-1 for 24 hours (left panel). Cells were lysed and subjected to SDS-PAGE and immunoblotting using anti-GAPDH and anti-LC3B antibodies. Phosphoimaging analysis of steady state LC3B levels are shown graphically below representative immunoblots. H1299 cells were treated with 0-10  $\mu$ M spautin-1 for 24 or 48 hours and subjected to an MTT assay (right panel). The data were graphed from 4 independent experiments (mean  $\pm$  SEM). Significance is indicated as  $*=P<0.05$ .

**C)** H1299 cells were treated with 0-10  $\mu$ M MG132 for 24 hours (left panel). Cells were lysed and subjected to SDS-PAGE and immunoblotting using anti-GAPDH and anti-LC3B antibodies. Phosphoimaging analysis of steady state LC3B levels are shown graphically below representative immunoblots. H1299 cells were treated with 0-10  $\mu$ M MG132 for 24 or 48 hours and subjected to an MTT assay (right panel). The data were graphed from 4 independent experiments (mean  $\pm$  SEM). Significance is indicated as  $*=P<0.05$ ,  $**P<0.01$  and  $***=P<0.001$ .

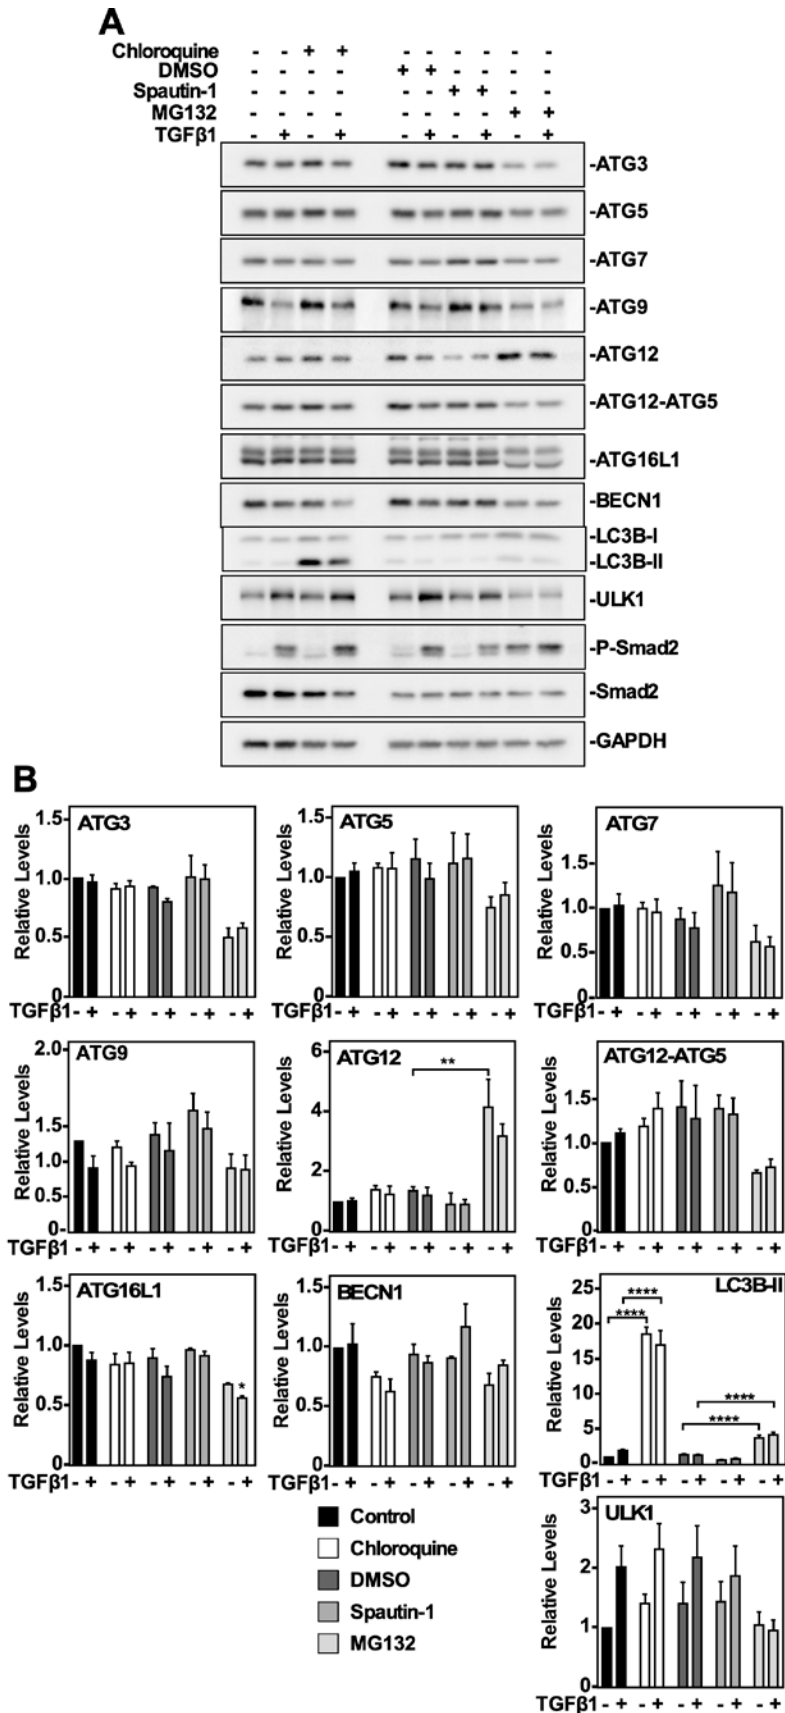

Supplemental Figure 4. Trelford and Di Guglielmo

**Figure S4. The effect of chloroquine, spautin-1 and MG132 on ATG protein levels in H1299 cells.**

**A)** H1299 cells were treated with 50  $\mu$ M chloroquine, 10  $\mu$ M spautin-1 or 5  $\mu$ M MG132 in the presence or absence of 250 pM TGF $\beta$ 1 for 24 hours. Cells were lysed and subjected to SDS-PAGE and immunoblotting using anti-ATG3, anti-ATG5, anti-ATG7, anti-ATG9, anti-ATG12, anti-ATG12-ATG5 complex, anti-ATG16L1, anti-BECN1, anti-ULK1, anti-LC3B, anti-P-Smad2, anti-Smad2 and anti-GAPDH (loading control) antibodies.

**B)** Phosphoimaging analysis of steady state ATG7 levels, ATG5 levels, ATG3 levels, ATG12-ATG5 levels, GAPDH levels, BECN1 levels, ATG12 levels, and LC3B levels were graphed. The data were graphed from 3 independent experiments (mean  $\pm$  SEM). Significance is indicated as \*= $P$ <0.05, \*\*= $P$ <0.01 and \*\*\*\*= $P$ <0.0001.



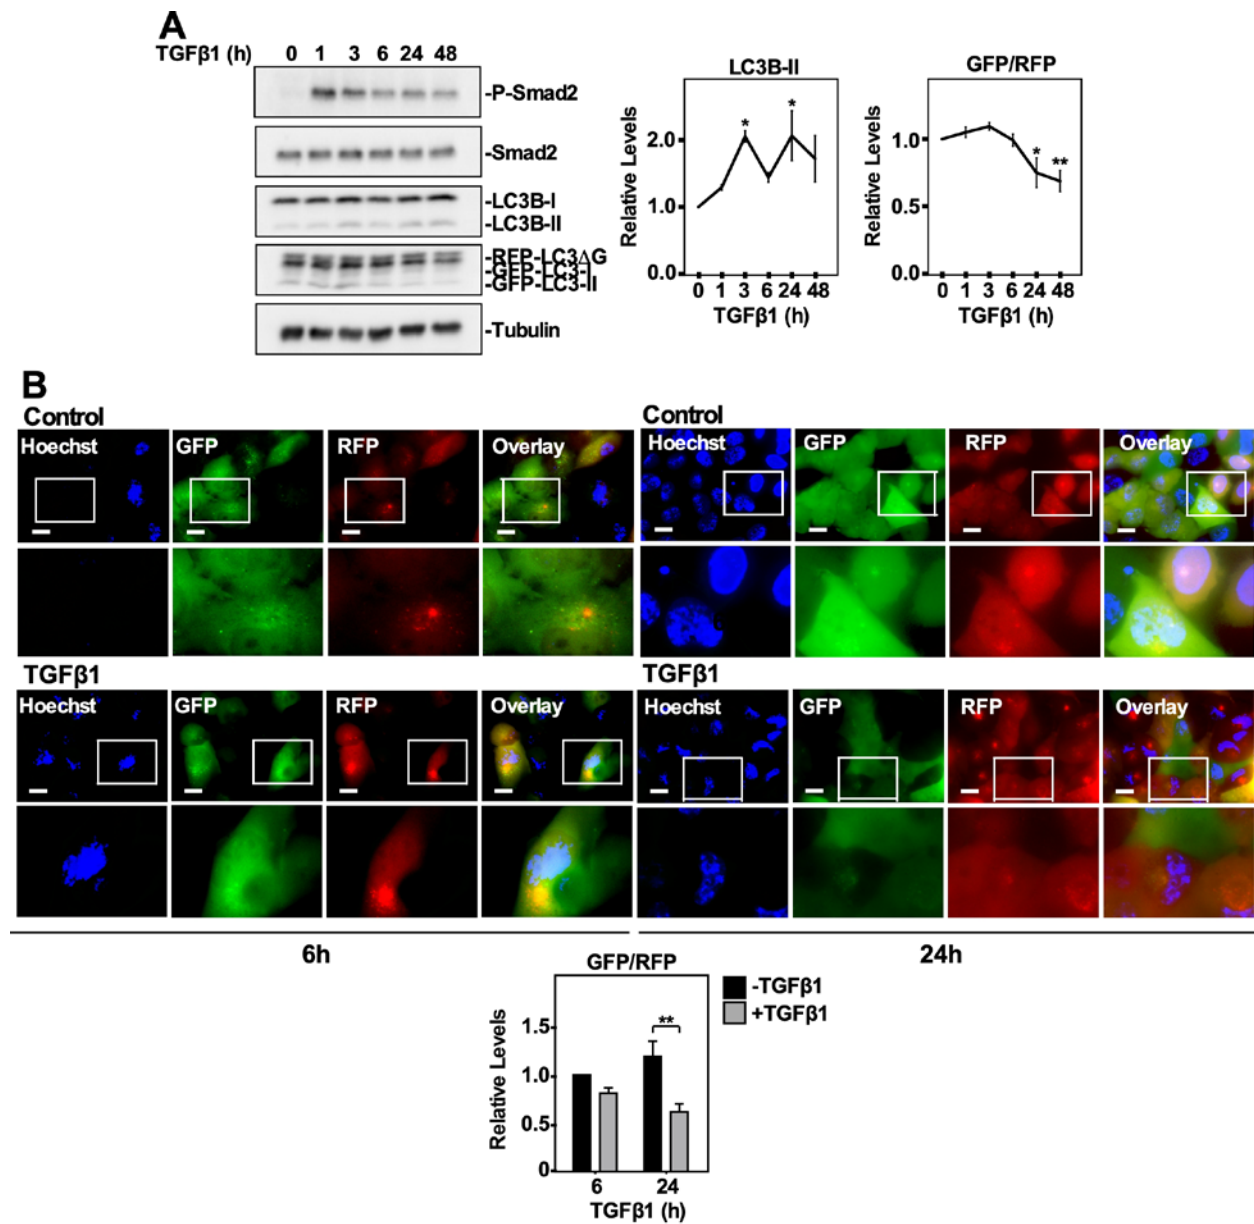

Supplemental Figure 5. Trelford and Di Guglielmo

**Figure S5. Using a pMRX-IP-GFP-LC3-RFP-LC3ΔG probe to assess TGFβ1-dependent autophagy in H1299 cells.**

A) H1299 cells stably expressing GFP-LC3-RFP-LC3ΔG were treated with 250 pM TGFβ1 for 0-48 hours, lysed, subjected to SDS-PAGE and immunoblotted with anti-P-Smad2, anti-Smad2, anti-LC3B, anti-GAPDH and anti-tubulin antibodies. Phosphoimaging analysis of steady state LC3B-II levels and the GFP/RFP ratio are shown graphically to the right of representative immunoblots. The data were graphed from 3 independent experiments (mean ± SEM). Significance is indicated as \*= $P < 0.05$  and \*\*= $P < 0.01$ .

B) H1299 cells stably expressing GFP-LC3-RFP-LC3ΔG were treated with 250 pM TGFβ1 for 6 or 24 hours. Hoechst stain (blue) was added 10 minutes prior to imaging. Images were obtained

with a 63x objective using an Olympus IX 81 inverted fluorescence microscope and Image J quantified the green and red pixel intensity. The GFP/RFP ratio is shown to the right of representative images. The data were graphed from 3 independent experiments (mean  $\pm$  SEM). Significance is indicated as \*\*= $P < 0.01$ . Scale bars = 10  $\mu\text{m}$ .

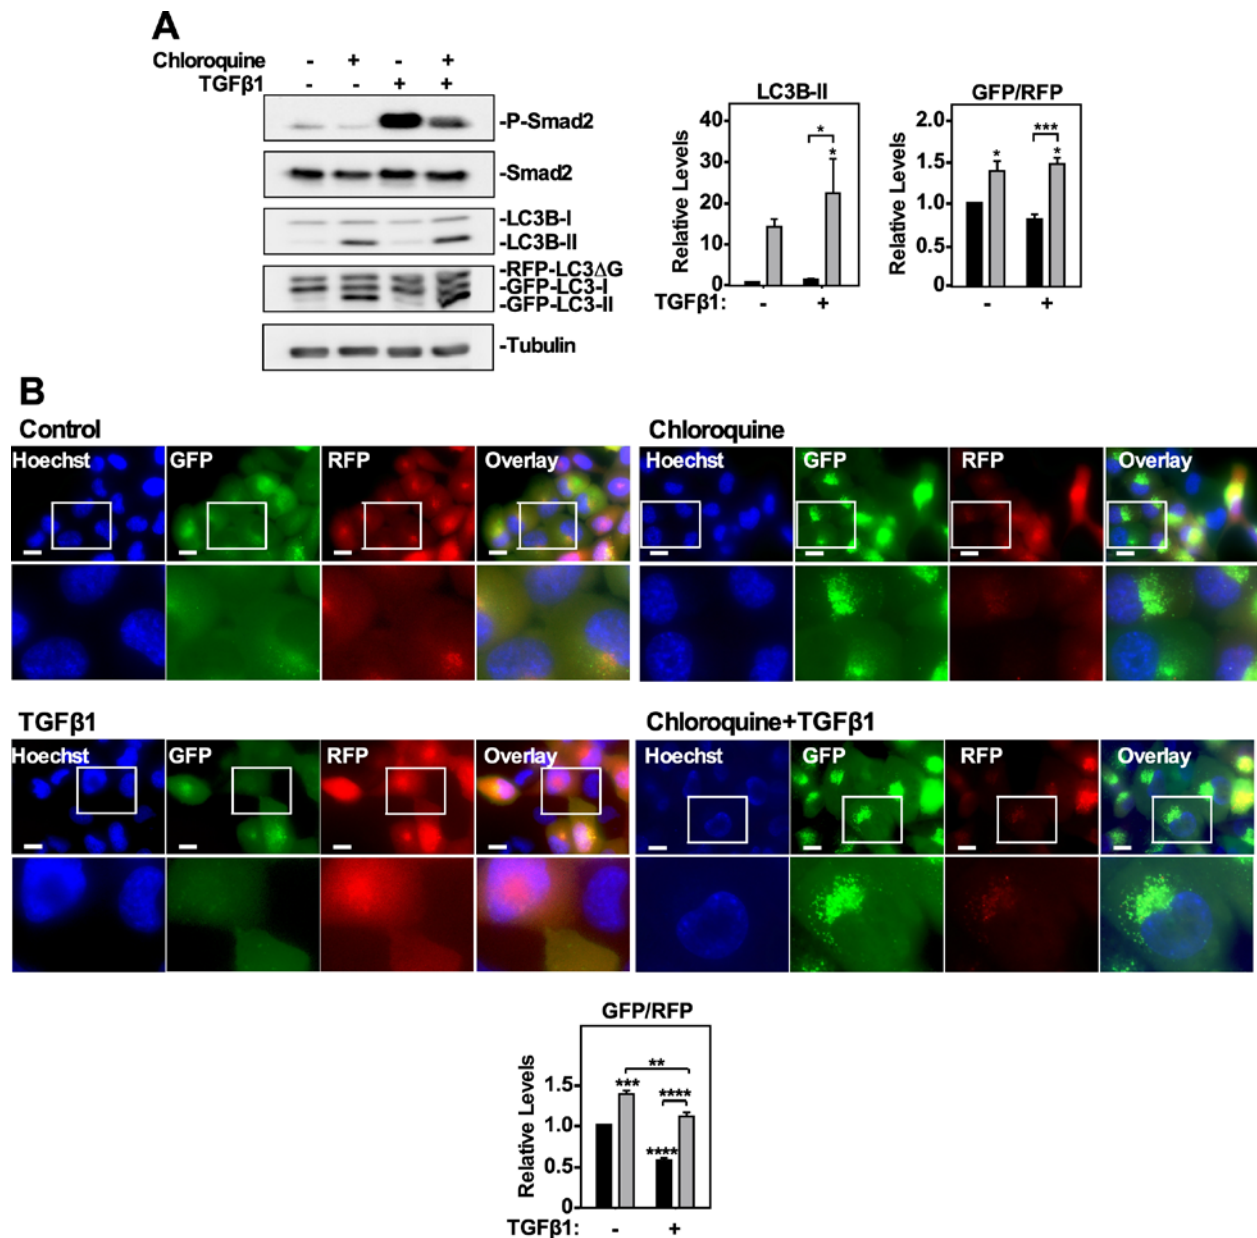

Supplemental Figure 6. Trelford and Di Guglielmo

**Figure S6. The effect of chloroquine on autophagic flux in H1299 cells.**

**A)** H1299 cells stably expressing GFP-LC3-RFP-LC3ΔG were treated with 50 μM chloroquine in the presence and absence of 250 pM TGFβ1 for 24 hours, lysed, subjected to SDS-PAGE and immunoblotted with anti-P-Smad2, anti-Smad2, anti-LC3B, anti-GAPDH and anti-tubulin antibodies. Phosphoimaging analysis of steady state LC3B-II levels and the GFP/RFP ratio are shown graphically to the right of representative immunoblots. The data were graphed from 3 independent experiments (mean ± SEM). Significance is indicated as \*=P<0.05 and \*\*\*P<0.001.

**B)** H1299 cells stably expressing GFP-LC3-RFP-LC3ΔG were treated with 50 μM chloroquine in the presence and absence of 250 pM TGFβ1 for 6 or 24 hours. Hoechst stain (blue) was added 10

minutes prior to imaging. Images were obtained with a 63x objective using an Olympus IX 81 inverted fluorescence microscope and Image J quantified the green and red pixel intensity. The GFP/RFP ratio is shown below representative images. The data were graphed from 3 independent experiments (mean  $\pm$  SEM). Significance is indicated as \*\* $P < 0.01$ , \*\*\*= $P < 0.001$  and \*\*\*\*= $P < 0.0001$ . Scale bars = 10  $\mu\text{m}$ .

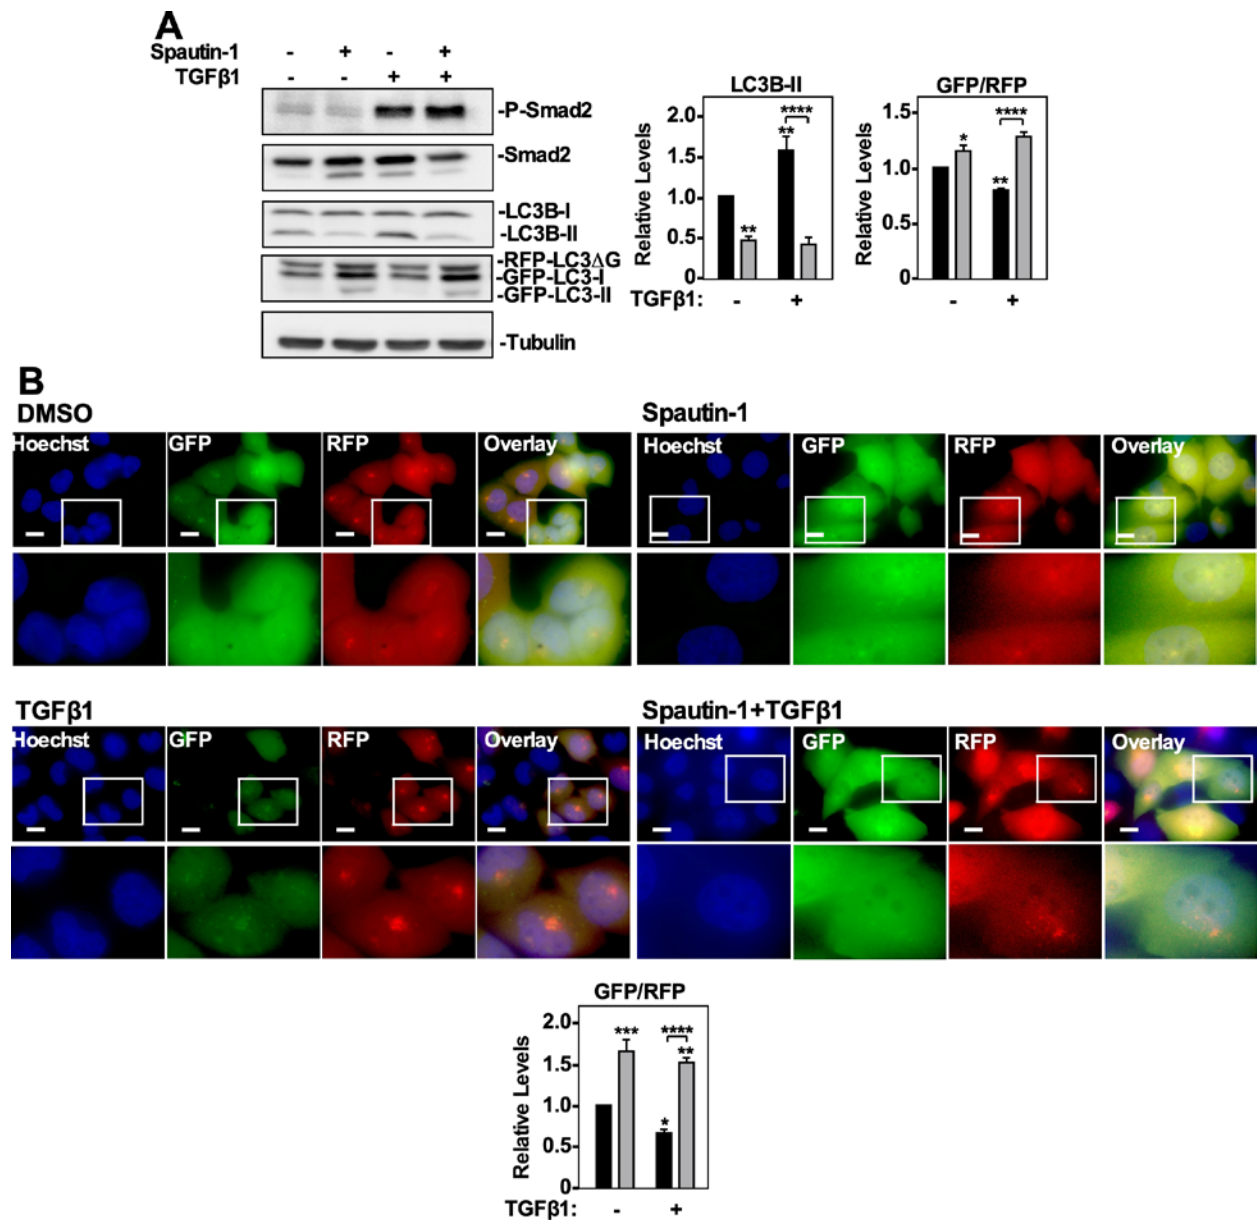

Supplemental Figure 7. Trelford and Di Guglielmo

**Figure S7. The effect of spautin-1 on autophagic flux in H1299 cells.**

A) H1299 cells stably expressing GFP-LC3-RFP-LC3ΔG were treated with 10 μM spautin-1 in the presence and absence of 250 pM TGFβ1 for 24 hours, lysed, subjected to SDS-PAGE and immunoblotted with anti-P-Smad2, anti-Smad2, anti-LC3B, anti-GAPDH and anti-tubulin antibodies. Phosphoimaging analysis of steady state LC3B-II levels and the GFP/RFP ratio are shown graphically to the right of representative immunoblots. The data were graphed from 3 independent experiments (mean ± SEM). Significance is indicated as \*= $P < 0.05$ , \*\*= $P < 0.01$  and \*\*\*\*= $P < 0.0001$ .

B) H1299 cells stably expressing GFP-LC3-RFP-LC3ΔG were treated with 10 μM spautin-1 in the presence and absence of 250 pM TGFβ1 for 6 or 24 hours. Hoechst stain (blue) was added 10

minutes prior to imaging. Images were obtained with a 63x objective using an Olympus IX 81 inverted fluorescence microscope and Image J quantified the green and red pixel intensity. The GFP/RFP ratio is shown below representative images. The data were graphed from 3 independent experiments (mean  $\pm$  SEM). Significance is indicated as \* $P$ <0.05, \*\* $P$ <0.01, \*\*\* $P$ <0.001 and \*\*\*\*= $P$ <0.0001. Scale bars = 10  $\mu$ m.

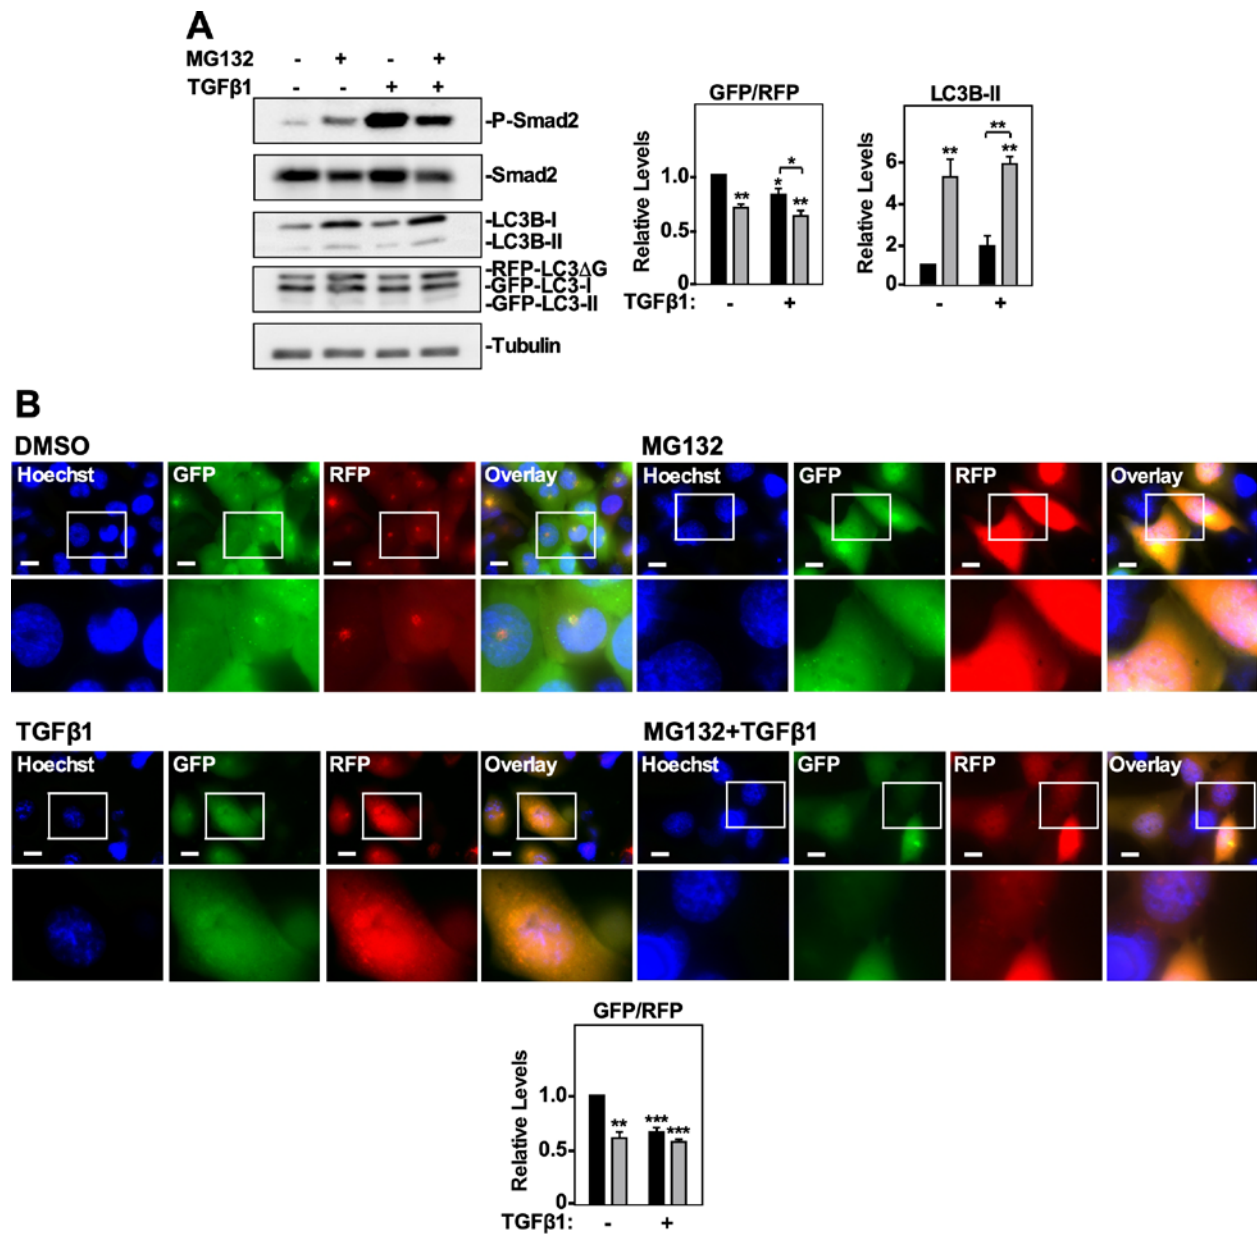

**Supplemental Figure 8. Trelford and Di Guglielmo**

**Figure S8. The effect of MG132 on autophagic flux in H1299 cells.**

**A)** H1299 cells stably expressing GFP-LC3-RFP-LC3ΔG were treated with 5 μM MG132 in the presence and absence of 250 pM TGFβ1 for 24 hours, lysed, subjected to SDS-PAGE and immunoblotted with anti-P-Smad2, anti-Smad2, anti-LC3B, anti-GAPDH and anti-tubulin antibodies. Phosphoimaging analysis of steady state LC3B-II levels and the GFP/RFP ratio are shown graphically to the right of representative immunoblots. The data were graphed from 3 independent experiments (mean ± SEM). Significance is indicated as \*= $P < 0.05$ , \*\*= $P < 0.01$ , \*\*\*= $P < 0.001$  and \*\*\*\*= $P < 0.0001$ .

**B)** H1299 cells stably expressing GFP-LC3-RFP-LC3ΔG were treated with 5 μM MG132 in the presence and absence of 250 pM TGFβ1 for 6 or 24 hours. Hoechst stain (blue) was added 10

minutes prior to imaging. Images were obtained with a 63x objective using an Olympus IX 81 inverted fluorescence microscope and Image J quantified the green and red pixel intensity. The GFP/RFP ratio is shown below representative images. The data were graphed from 3 independent experiments (mean  $\pm$  SEM). Significance is indicated as \*\*P<0.01 and \*\*\*P<0.001. Scale bars = 10  $\mu$ m.



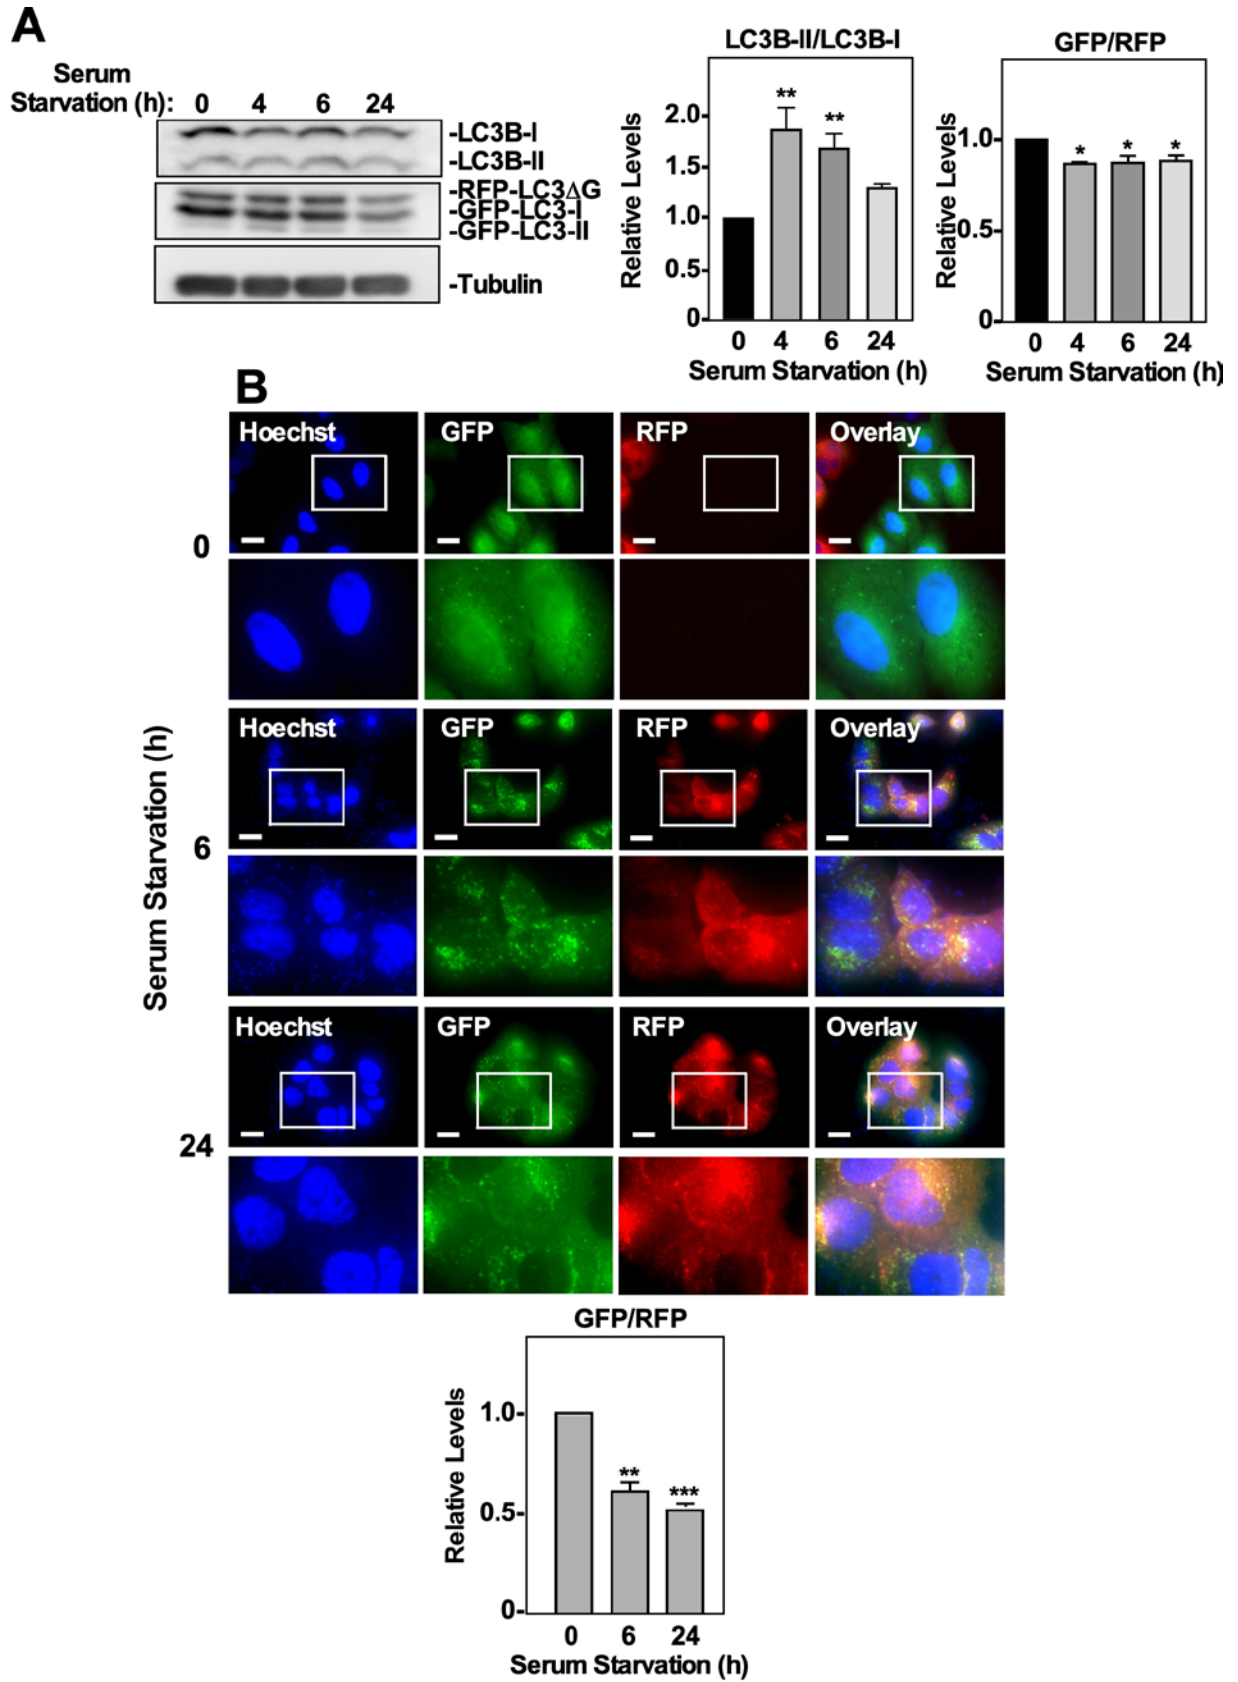

Supplemental Figure 9. Trelford and Di Guglielmo

**Figure S9. Using a GFP-LC3-RFP-LC3ΔG probe to assess serum starvation induced autophagy in H1299 cells.**

**A)** H1299 cells stably expressing GFP-LC3-RFP-LC3ΔG were serum starved for 0, 4, 6 or 24 hours, lysed, subjected to SDS-PAGE and immunoblotted with anti-LC3B and anti-tubulin antibodies. Phosphoimaging analysis of LC3B-II/LC3B-I and GFP/RFP ratios are shown graphically to the right of representative immunoblots. The data were graphed from 3 independent experiments (mean ± SEM). Significance is indicated as \*=P<0.05 and \*\*=P<0.01.

**B)** H1299 cells stably expressing GFP-LC3-RFP-LC3ΔG were serum starved for 0, 6 or 24 hours. Hoechst stain (blue) was added 10 minutes prior to imaging. Images were obtained with a 63x objective using an Olympus IX 81 inverted fluorescence microscope and Image J quantified the green and red pixel intensity. The GFP/RFP ratio is shown below representative images. The data were graphed from 3 independent experiments (mean ± SEM). Significance is indicated as \*\*=P<0.01 and \*\*\*=P<0.001. Scale bars = 10 μm.

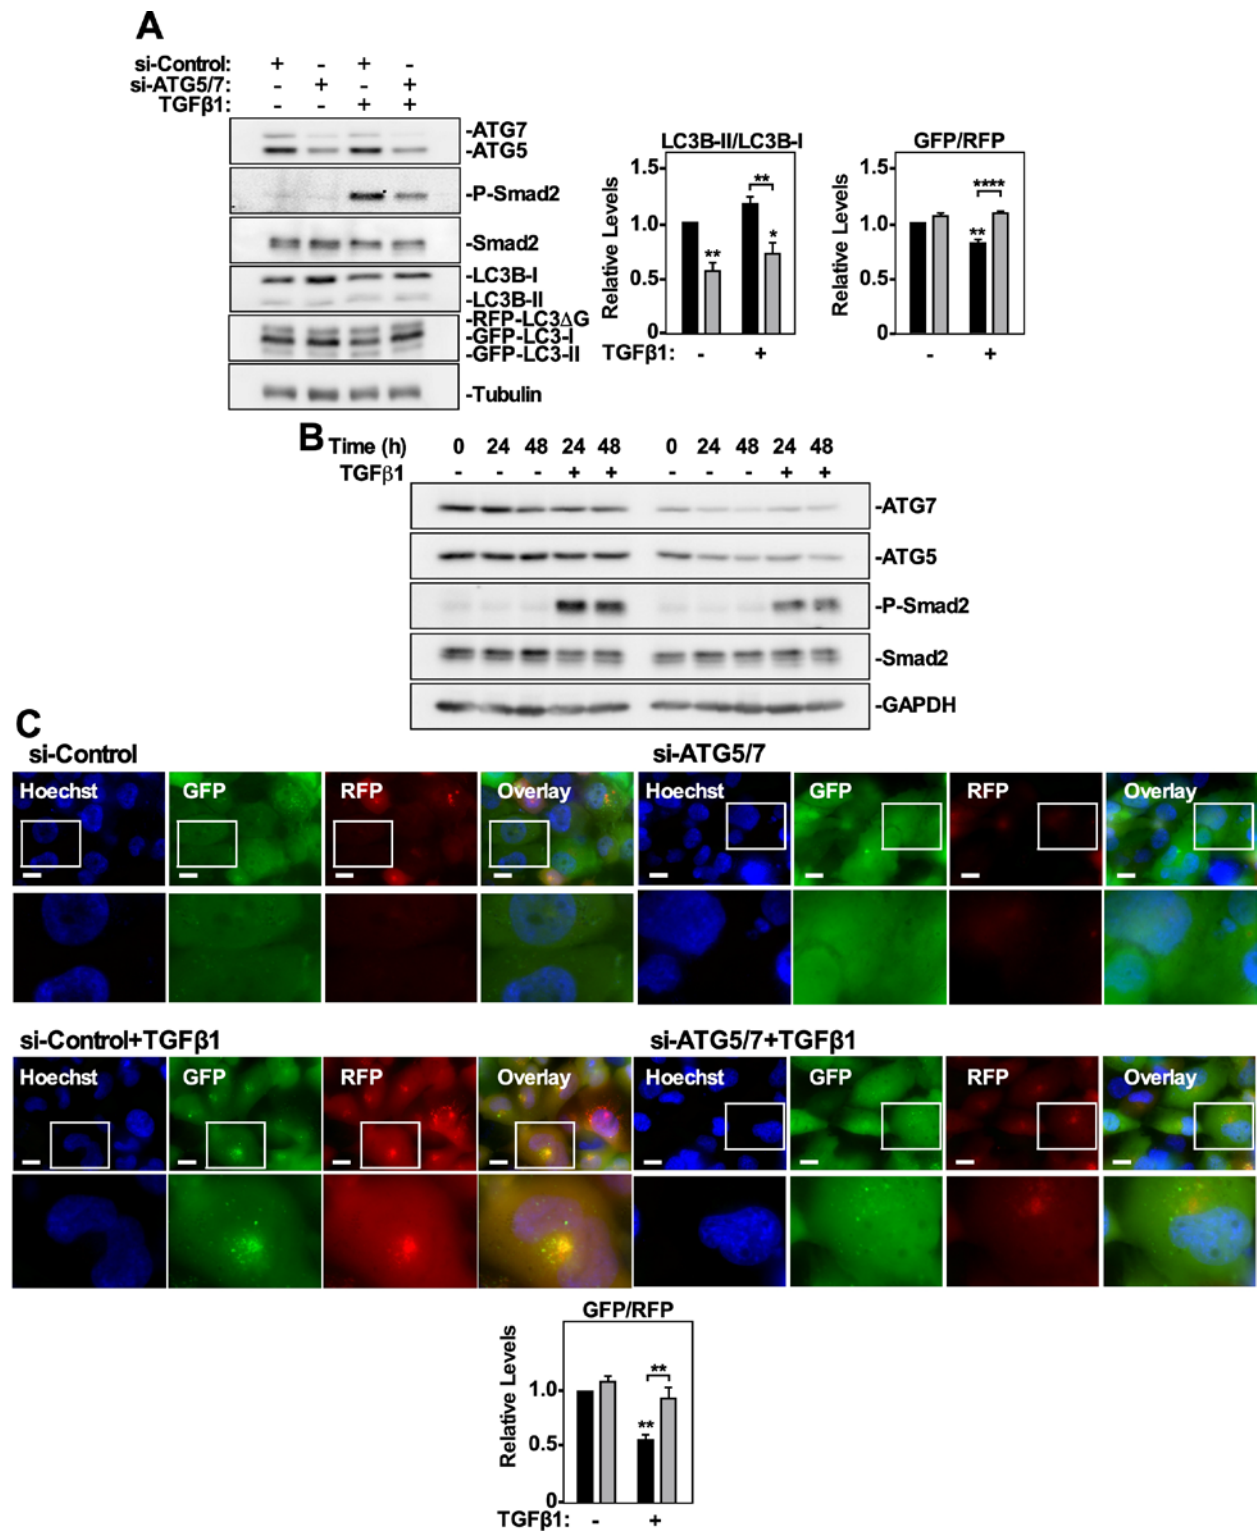

Supplemental Figure 10. Trelford and Di Guglielmo

Figure S10. The effect of ATG5 and ATG7 silencing on TGFβ1-dependent autophagy in H1299 cells.

**A)** H1299 cells stably expressing GFP-LC3-RFP-LC3 $\Delta$ G were transfected with control siRNA (si-Control) or siRNA targeting ATG5 and ATG7 (si-ATG5/7) were incubated for 24 hours in the presence or absence of 250 pM TGF $\beta$ 1. The cells were lysed, subjected to SDS-PAGE and immunoblotted with anti-ATG7, anti-ATG5, anti-P-Smad2, anti-Smad2, anti-LC3B, anti-GAPDH and anti-tubulin antibodies. Phosphoimaging analysis of LC3B-II/LC3B-I and GFP/RFP ratios are shown graphically to the right of representative immunoblots. The data were graphed from 3 independent experiments (mean  $\pm$  SEM). Significance is indicated as \*= $P$ <0.05, \*\*= $P$ <0.01 and \*\*\*\*= $P$ <0.0001.

**B)** H1299 cells stably expressing GFP-LC3-RFP-LC3 $\Delta$ G were incubated with 250 pM TGF $\beta$ 1 for 0, 24 or 48h. Cells were then lysed and immunoblotted with anti-ATG7, anti-ATG5, anti-P-Smad2, anti-Smad2 and anti-GAPDH antibodies.

**C)** H1299 cells stably expressing GFP-LC3-RFP-LC3 $\Delta$ G were transfected with control siRNA (si-Control) or siRNA targeting ATG5 and ATG7 (si-ATG5/7) were incubated for 24 hours in the presence or absence of 250 pM TGF $\beta$ 1. Hoechst stain (blue) was added 10 minutes prior to imaging. Images were obtained with a 63x objective using an Olympus IX 81 inverted fluorescence microscope and Image J quantified the green and red pixel intensity. The GFP/RFP ratio is shown below representative images. The data were graphed from 3 independent experiments (mean  $\pm$  SEM). Significance is indicated as \*\*\*= $P$ <0.001 and \*\*= $P$ <0.01. Scale bars = 10  $\mu$ m.
